# Supplementary material for: 4mCpred-EL: An Ensemble Learning Framework for Identification of DNA N4-Methylcytosine Sites in the Mouse Genome
Source: PubMed Central journal article supplement (PMC6912380; doi:10.3390/cells8111332), 2019-10-28
Supplement: cells-08-01332-s001.pdf [file cells-08-01332-s001.pdf]

# 4mCpred-EL: an Ensemble Learning Framework for the Prediction of DNA $N^4$ -methylcytosine Sites in the Mouse Genome

*Balachandran Manavalan<sup>1</sup>, Shaherin Basith<sup>1</sup>, Tae Hwan Shin<sup>1</sup>, Da Yeon Lee<sup>1</sup>, Leyi Wei<sup>2,\*</sup>,  
Gwang Lee<sup>1,\*</sup>*

<sup>1</sup>Department of Physiology, Ajou University School of Medicine, Suwon, Republic of Korea, <sup>2</sup>School of Computer Science and Technology, Tianjin University, China

**\* Corresponding authors**

E-mail: weileyi@tju.edu.cn and glee@ajou.ac.kr

**Supporting Information**

## Supplementary tables

**Table S1.** The values of 15 DNA dinucleotide physicochemical properties

|      | Property | AA/TT | AC/GT | AG/CT | AT    | CA/TG | CC/GG | CG     | GA/TC  | GC    | TA    |
|------|----------|-------|-------|-------|-------|-------|-------|--------|--------|-------|-------|
| PC1  | F-roll   | 0.04  | 0.06  | 0.04  | 0.05  | 0.04  | 0.04  | 0.04   | 0.05   | 0.05  | 0.03  |
| PC2  | F-tilt   | 0.08  | 0.07  | 0.06  | 0.1   | 0.06  | 0.06  | 0.06   | 0.07   | 0.07  | 0.07  |
| PC3  | F-twist  | 0.07  | 0.06  | 0.05  | 0.07  | 0.05  | 0.06  | 0.05   | 0.06   | 0.06  | 0.05  |
| PC4  | F-slide  | 6.69  | 6.8   | 3.47  | 9.61  | 2.00  | 2.99  | 2.71   | 4.27   | 4.21  | 1.85  |
| PC5  | F-shift  | 6.24  | 2.91  | 2.8   | 4.66  | 2.88  | 2.67  | 3.02   | 3.58   | 2.66  | 4.11  |
| PC6  | F-rise   | 21.34 | 21.98 | 17.48 | 24.79 | 14.51 | 14.25 | 14.66  | 18.41  | 17.31 | 14.24 |
| PC7  | Roll     | 1.05  | 2.01  | 3.6   | 0.61  | 5.60  | 4.68  | 6.02   | 2.44   | 1.70  | 3.50  |
| PC8  | Tilt     | -1.26 | 0.33  | -1.66 | 0     | 0.14  | -0.77 | 0      | 1.44   | 0     | 0     |
| PC9  | Twist    | 35.02 | 31.53 | 32.29 | 30.72 | 35.43 | 33.54 | 33.67  | 35.67  | 34.07 | 36.94 |
| PC10 | Slide    | -0.18 | -0.59 | -0.22 | -0.68 | 0.48  | -0.17 | 0.44   | -0.05  | -0.19 | 0.04  |
| PC11 | Shift    | 0.01  | -0.02 | -0.02 | 0     | 0.01  | 0.03  | 0      | -0.01  | 0     | 0     |
| PC12 | Rise     | 3.25  | 3.24  | 3.32  | 3.21  | 3.37  | 3.36  | 3.29   | 3.30   | 3.27  | 3.39  |
| PC13 | Energy   | -1.00 | -1.44 | -1.28 | -0.88 | -1.45 | -1.84 | -2.17  | -1.30  | -2.24 | -0.58 |
| PC14 | Enthalpy | -7.60 | -8.40 | -7.80 | -7.20 | -8.50 | -8.00 | -10.60 | -8.20  | -9.80 | -7.20 |
| PC15 | Entropy  | -21.3 | -22.4 | -21.0 | -20.4 | -22.7 | -19.9 | -27.2  | -22.20 | -24.4 | -21.3 |

**Table S2.** The values of 11 DNA trinucleotide physicochemical properties.

| Trinucleotide | PC1  | PC2  | PC3 | PC4 | PC5  | PC6  | PC7  | PC8  | PC9    | PC11  | PC12 |
|---------------|------|------|-----|-----|------|------|------|------|--------|-------|------|
| GGG           | 5.70 | 5.85 | 3   | 13  | 5.83 | 5.83 | 3.31 | 3.87 | 622.40 | 6.00  | 3.54 |
| GGA           | 6.20 | 5.00 | 2   | -5  | 4.99 | 4.99 | 3.82 | 3.58 | 622.40 | 3.80  | 4.80 |
| GGC           | 8.20 | 9.10 | 3   | 45  | 9.08 | 9.08 | 1.39 | 2.45 | 622.40 | 10.00 | 1.31 |
| GGT           | 5.20 | 5.30 | 2   | 8   | 5.32 | 5.32 | 3.62 | 4.16 | 622.40 | 5.40  | 3.88 |
| GAG           | 6.60 | 6.00 | 2   | 8   | 5.98 | 5.98 | 3.22 | 3.35 | 621.40 | 5.40  | 3.88 |
| GAA           | 5.10 | 4.05 | 1   | -12 | 4.06 | 4.06 | 4.39 | 4.21 | 621.40 | 3.00  | 5.26 |
| GAC           | 5.60 | 5.50 | 2   | 8   | 5.52 | 5.52 | 3.50 | 3.93 | 621.40 | 5.40  | 3.88 |
| GAT           | 3.60 | 4.45 | 1   | 7   | 4.44 | 4.44 | 4.15 | 5.09 | 621.40 | 5.30  | 3.94 |
| GCG           | 4.30 | 5.90 | 3   | 25  | 5.89 | 5.89 | 3.28 | 4.68 | 622.40 | 7.50  | 2.69 |
| GCA           | 7.50 | 6.75 | 2   | 13  | 6.76 | 6.76 | 2.75 | 2.84 | 622.40 | 6.00  | 3.54 |
| GCC           | 8.20 | 9.10 | 3   | 45  | 9.08 | 9.08 | 1.39 | 2.45 | 622.40 | 10.00 | 1.31 |
| GCT           | 6.30 | 6.90 | 2   | 25  | 6.88 | 6.88 | 2.68 | 3.52 | 622.40 | 7.50  | 2.69 |
| GTG           | 6.80 | 6.65 | 2   | 17  | 6.63 | 6.63 | 2.83 | 3.24 | 621.40 | 6.50  | 3.25 |
| GTA           | 6.40 | 5.05 | 1   | -6  | 5.07 | 5.07 | 3.77 | 3.47 | 621.40 | 3.70  | 4.86 |
| GTC           | 5.60 | 5.50 | 2   | 8   | 5.52 | 5.52 | 3.50 | 3.93 | 621.40 | 5.40  | 3.88 |
| GTT           | 1.60 | 2.65 | 1   | -6  | 2.64 | 2.64 | 5.26 | 6.27 | 621.40 | 3.70  | 4.86 |
| AGG           | 4.70 | 5.05 | 2   | 8   | 5.05 | 5.05 | 3.78 | 4.45 | 622.40 | 5.40  | 3.88 |
| AGA           | 6.50 | 4.90 | 1   | -9  | 4.89 | 4.89 | 3.88 | 3.41 | 622.40 | 3.30  | 5.09 |
| AGC           | 6.30 | 6.90 | 2   | 25  | 6.88 | 6.88 | 2.68 | 3.52 | 622.40 | 7.50  | 2.69 |
| AGT           | 2.00 | 3.90 | 1   | 11  | 3.92 | 3.92 | 4.47 | 6.03 | 622.40 | 5.80  | 3.65 |
| AAG           | 4.20 | 4.70 | 1   | 6   | 4.70 | 4.70 | 4.00 | 4.74 | 621.40 | 5.20  | 3.99 |
| AAA           | 0.10 | 0.05 | 0   | -36 | 0.06 | 0.06 | 6.88 | 7.18 | 621.40 | 0.00  | 7.05 |
| AAC           | 1.60 | 2.65 | 1   | -6  | 2.64 | 2.64 | 5.26 | 6.27 | 621.40 | 3.70  | 4.86 |
| AAT           | 0.00 | 0.35 | 0   | -30 | 0.35 | 0.35 | 6.70 | 7.24 | 621.40 | 0.70  | 6.62 |
| ACG           | 5.20 | 5.30 | 2   | 8   | 5.31 | 5.31 | 3.63 | 4.16 | 622.40 | 5.40  | 3.88 |
| ACA           | 5.80 | 5.50 | 1   | 6   | 5.49 | 5.49 | 3.52 | 3.81 | 622.40 | 5.20  | 3.99 |
| ACC           | 5.20 | 5.30 | 2   | 8   | 5.32 | 5.32 | 3.62 | 4.16 | 622.40 | 5.40  | 3.88 |
| ACT           | 2.00 | 3.90 | 1   | 11  | 3.92 | 3.92 | 4.47 | 6.03 | 622.40 | 5.80  | 3.65 |
| ATG           | 8.70 | 7.70 | 1   | 18  | 7.72 | 7.72 | 2.19 | 2.17 | 621.40 | 6.70  | 3.14 |
| ATA           | 9.70 | 6.25 | 0   | -13 | 6.27 | 6.27 | 3.05 | 1.61 | 621.40 | 2.80  | 5.38 |
| ATC           | 3.60 | 4.45 | 1   | 7   | 4.44 | 4.44 | 4.15 | 5.09 | 621.40 | 5.30  | 3.94 |
| ATT           | 0.00 | 0.35 | 0   | -30 | 0.35 | 0.35 | 6.70 | 7.24 | 621.40 | 0.70  | 6.62 |
| CGG           | 3.00 | 3.85 | 3   | 2   | 3.87 | 3.87 | 4.50 | 5.44 | 622.40 | 4.70  | 4.28 |
| CGA           | 5.80 | 7.05 | 2   | 31  | 7.07 | 7.07 | 2.57 | 3.81 | 622.40 | 8.30  | 2.25 |
| CGC           | 4.30 | 5.90 | 3   | 25  | 5.89 | 5.89 | 3.28 | 4.68 | 622.40 | 7.50  | 2.69 |
| CGT           | 5.20 | 5.30 | 2   | 8   | 5.31 | 5.31 | 3.63 | 4.16 | 622.40 | 5.40  | 3.88 |
| CAG           | 9.60 | 6.90 | 2   | -2  | 6.90 | 6.90 | 2.67 | 1.67 | 621.40 | 4.20  | 4.57 |
| CAA           | 6.20 | 4.75 | 1   | -9  | 4.76 | 4.76 | 3.96 | 3.58 | 621.40 | 3.30  | 5.09 |
| CAC           | 6.80 | 6.65 | 2   | 17  | 6.63 | 6.63 | 2.83 | 3.24 | 621.40 | 6.50  | 3.25 |

|     |       |      |   |     |      |      |       |      |        |      |      |
|-----|-------|------|---|-----|------|------|-------|------|--------|------|------|
| CAT | 8.70  | 7.70 | 1 | 18  | 7.72 | 7.72 | 2.19  | 2.17 | 621.40 | 6.70 | 3.14 |
| CCG | 3.00  | 3.85 | 3 | 2   | 3.87 | 3.87 | 4.50  | 5.44 | 622.40 | 4.70 | 4.28 |
| CCA | 0.70  | 3.05 | 2 | 8   | 3.06 | 3.06 | 5.00  | 6.81 | 622.40 | 5.40 | 3.88 |
| CCC | 5.70  | 5.85 | 3 | 13  | 5.83 | 5.83 | 3.31  | 3.87 | 622.40 | 6.00 | 3.54 |
| CCT | 4.70  | 5.05 | 2 | 8   | 5.05 | 5.05 | 3.78  | 4.45 | 622.40 | 5.40 | 3.88 |
| CTG | 9.60  | 6.90 | 2 | -2  | 6.90 | 6.90 | 2.67  | 1.67 | 621.40 | 4.20 | 4.57 |
| CTA | 7.80  | 5.00 | 1 | -18 | 5.00 | 5.00 | 3.81  | 2.67 | 621.40 | 2.20 | 5.73 |
| CTC | 6.60  | 6.00 | 2 | 8   | 5.98 | 5.98 | 3.22  | 3.35 | 621.40 | 5.40 | 3.88 |
| CTT | 4.20  | 4.70 | 1 | 6   | 4.70 | 4.70 | 4.00  | 4.74 | 621.40 | 5.20 | 3.99 |
| TGG | 0.70  | 3.05 | 2 | 8   | 3.06 | 3.06 | 5.00  | 6.81 | 622.40 | 5.40 | 3.88 |
| TGA | 10.00 | 7.70 | 1 | 8   | 7.70 | 7.70 | 10.00 | 1.45 | 622.40 | 5.40 | 3.88 |
| TGC | 7.50  | 6.75 | 2 | 13  | 6.76 | 6.76 | 2.75  | 2.84 | 622.40 | 6.00 | 3.54 |
| TGT | 5.80  | 5.50 | 1 | 6   | 5.49 | 5.49 | 3.52  | 3.81 | 622.40 | 5.20 | 3.99 |
| TAG | 7.80  | 5.00 | 1 | -18 | 5.00 | 5.00 | 3.81  | 2.67 | 621.40 | 2.20 | 5.73 |
| TAA | 7.30  | 4.65 | 0 | -20 | 4.67 | 4.67 | 4.01  | 2.96 | 621.40 | 2.00 | 5.85 |
| TAC | 6.40  | 5.05 | 1 | -6  | 5.07 | 5.07 | 3.77  | 3.47 | 621.40 | 3.70 | 4.86 |
| TAT | 9.70  | 6.25 | 0 | -13 | 6.27 | 6.27 | 3.05  | 1.61 | 621.40 | 2.80 | 5.38 |
| TCG | 5.80  | 7.05 | 2 | 31  | 7.07 | 7.07 | 2.57  | 3.81 | 622.40 | 8.30 | 2.25 |
| TCA | 10.00 | 7.70 | 1 | 8   | 7.70 | 7.70 | 2.20  | 1.45 | 622.40 | 5.40 | 3.88 |
| TCC | 6.20  | 5.00 | 2 | -5  | 4.99 | 4.99 | 3.82  | 3.58 | 622.40 | 3.80 | 4.80 |
| TCT | 6.50  | 4.90 | 1 | -9  | 4.89 | 4.89 | 3.88  | 3.41 | 622.40 | 3.30 | 5.09 |
| TTG | 6.20  | 4.75 | 1 | -9  | 4.76 | 4.76 | 3.96  | 3.58 | 621.40 | 3.30 | 5.09 |
| TTA | 7.30  | 4.65 | 0 | -20 | 4.67 | 4.67 | 4.01  | 2.96 | 621.40 | 2.00 | 5.85 |
| TTC | 5.10  | 4.05 | 1 | -12 | 4.06 | 4.06 | 4.39  | 4.21 | 621.40 | 3.00 | 5.26 |
| TTT | 0.10  | 0.05 | 0 | -36 | 0.06 | 0.06 | 0.10  | 7.18 | 621.40 | 0.00 | 7.05 |

The first column represents the trinucleotides. PC1: Bendability (DNase); PC2: Bendability (consensus); PC3: Trinucleotide CG content; PC4: Nucleosome positioning; PC5: Consensus (roll), PC6: Consensus (rigid), PC7: DNase I; PC8: DNase I (rigid); PC9: Molecular weight (Daltons); PC10: Nucleosome; PC11: Nucleosome (rigid).

**Table S3.** The performance of different classifiers on seven different feature encodings using benchmarking dataset

| Classifier | Encoding | MCC         | ACC         | SN          | SP          | AUC         |
|------------|----------|-------------|-------------|-------------|-------------|-------------|
| RF         | BPF      | 0.369±0.025 | 0.684±0.018 | 0.678±0.031 | 0.690±0.025 | 0.731±0.024 |
|            | DPCP     | 0.508±0.010 | 0.754±0.005 | 0.736±0.009 | 0.772±0.007 | 0.816±0.004 |
|            | EIIP     | 0.556±0.029 | 0.778±0.015 | 0.760±0.022 | 0.796±0.018 | 0.851±0.028 |
|            | Kmer     | 0.558±0.009 | 0.779±0.004 | 0.762±0.014 | 0.796±0.008 | 0.849±0.007 |
|            | M6AMRFS  | 0.385±0.016 | 0.692±0.008 | 0.700±0.011 | 0.685±0.008 | 0.744±0.010 |
|            | RFHC     | 0.384±0.015 | 0.692±0.008 | 0.710±0.007 | 0.674±0.011 | 0.738±0.009 |
|            | TPCP     | 0.539±0.010 | 0.769±0.005 | 0.750±0.005 | 0.788±0.008 | 0.836±0.006 |
| SVM        | BPF      | 0.393±0.015 | 0.696±0.007 | 0.692±0.028 | 0.701±0.027 | 0.715±0.077 |
|            | DPCP     | 0.547±0.003 | 0.773±0.001 | 0.757±0.004 | 0.789±0.002 | 0.845±0.005 |
|            | EIIP     | 0.545±0.017 | 0.772±0.009 | 0.761±0.012 | 0.784±0.007 | 0.841±0.006 |
|            | Kmer     | 0.559±0.005 | 0.780±0.002 | 0.775±0.004 | 0.784±0.005 | 0.854±0.003 |
|            | M6AMRFS  | 0.394±0.012 | 0.697±0.006 | 0.704±0.011 | 0.689±0.008 | 0.757±0.011 |
|            | RFHC     | 0.403±0.014 | 0.701±0.007 | 0.693±0.030 | 0.709±0.030 | 0.714±0.090 |
|            | TPCP     | 0.557±0.006 | 0.778±0.003 | 0.766±0.003 | 0.790±0.007 | 0.846±0.004 |
| ERT        | BPF      | 0.415±0.010 | 0.708±0.005 | 0.708±0.012 | 0.707±0.008 | 0.757±0.011 |
|            | DPCP     | 0.517±0.009 | 0.758±0.005 | 0.731±0.010 | 0.786±0.009 | 0.822±0.004 |
|            | EIIP     | 0.541±0.005 | 0.771±0.002 | 0.751±0.004 | 0.790±0.004 | 0.836±0.004 |
|            | Kmer     | 0.559±0.008 | 0.779±0.004 | 0.758±0.008 | 0.800±0.004 | 0.848±0.005 |
|            | M6AMRFS  | 0.393±0.011 | 0.696±0.006 | 0.700±0.007 | 0.692±0.012 | 0.748±0.008 |
|            | RFHC     | 0.409±0.008 | 0.704±0.004 | 0.708±0.004 | 0.701±0.010 | 0.755±0.010 |
|            | TPCP     | 0.415±0.010 | 0.708±0.005 | 0.708±0.012 | 0.707±0.008 | 0.757±0.011 |
| GB         | BPF      | 0.395±0.014 | 0.698±0.007 | 0.706±0.009 | 0.689±0.012 | 0.751±0.009 |
|            | DPCP     | 0.502±0.013 | 0.751±0.006 | 0.733±0.006 | 0.768±0.010 | 0.809±0.006 |
|            | EIIP     | 0.526±0.006 | 0.763±0.003 | 0.747±0.006 | 0.779±0.003 | 0.833±0.004 |
|            | Kmer     | 0.556±0.011 | 0.778±0.006 | 0.762±0.011 | 0.793±0.002 | 0.845±0.010 |
|            | M6AMRFS  | 0.372±0.013 | 0.686±0.006 | 0.693±0.011 | 0.679±0.006 | 0.741±0.006 |
|            | RFHC     | 0.375±0.016 | 0.688±0.008 | 0.699±0.014 | 0.676±0.010 | 0.741±0.011 |
|            | TPCP     | 0.533±0.014 | 0.766±0.007 | 0.754±0.011 | 0.779±0.011 | 0.836±0.009 |
| AB         | BPF      | 0.326±0.009 | 0.663±0.005 | 0.679±0.010 | 0.646±0.011 | 0.663±0.005 |
|            | DPCP     | 0.499±0.009 | 0.750±0.004 | 0.735±0.008 | 0.764±0.006 | 0.750±0.004 |
|            | EIIP     | 0.514±0.012 | 0.757±0.006 | 0.746±0.005 | 0.768±0.011 | 0.760±0.008 |
|            | Kmer     | 0.537±0.014 | 0.769±0.007 | 0.755±0.010 | 0.782±0.006 | 0.777±0.008 |
|            | M6AMRFS  | 0.344±0.011 | 0.672±0.005 | 0.702±0.008 | 0.641±0.002 | 0.673±0.004 |
|            | RFHC     | 0.342±0.010 | 0.671±0.005 | 0.692±0.006 | 0.649±0.006 | 0.672±0.006 |
|            | TPCP     | 0.523±0.010 | 0.762±0.005 | 0.749±0.006 | 0.774±0.008 | 0.766±0.005 |
| KNN        | BPF      | 0.347±0.012 | 0.673±0.006 | 0.707±0.014 | 0.639±0.024 | 0.733±0.005 |
|            | DPCP     | 0.474±0.003 | 0.736±0.002 | 0.692±0.010 | 0.780±0.006 | 0.815±0.003 |
|            | EIIP     | 0.469±0.014 | 0.726±0.007 | 0.593±0.011 | 0.859±0.004 | 0.820±0.002 |
|            | Kmer     | 0.472±0.020 | 0.735±0.010 | 0.699±0.016 | 0.772±0.008 | 0.812±0.003 |
|            | M6AMRFS  | 0.355±0.017 | 0.677±0.008 | 0.710±0.034 | 0.644±0.026 | 0.740±0.008 |
|            | RFHC     | 0.355±0.014 | 0.677±0.007 | 0.711±0.016 | 0.642±0.027 | 0.738±0.008 |
|            | TPCP     | 0.488±0.011 | 0.738±0.006 | 0.621±0.016 | 0.854±0.004 | 0.828±0.001 |
| LR         | BPF      | 0.301±0.013 | 0.650±0.006 | 0.662±0.006 | 0.639±0.013 | 0.701±0.005 |
|            | DPCP     | 0.518±0.004 | 0.759±0.002 | 0.756±0.006 | 0.762±0.006 | 0.835±0.003 |
|            | EIIP     | 0.523±0.019 | 0.762±0.010 | 0.762±0.011 | 0.761±0.008 | 0.836±0.007 |

|  |         |             |             |             |             |             |
|--|---------|-------------|-------------|-------------|-------------|-------------|
|  | Kmer    | 0.535±0.005 | 0.767±0.002 | 0.759±0.005 | 0.775±0.002 | 0.844±0.004 |
|  | M6AMRFS | 0.313±0.010 | 0.657±0.005 | 0.669±0.005 | 0.644±0.006 | 0.715±0.008 |
|  | RFHC    | 0.307±0.012 | 0.653±0.006 | 0.669±0.007 | 0.638±0.012 | 0.715±0.004 |
|  | TPCP    | 0.537±0.003 | 0.768±0.002 | 0.758±0.003 | 0.778±0.001 | 0.842±0.004 |
